# Supplementary material for: In Silico Analysis of Correlations between Protein Disorder and Post-Translational Modifications in Algae
Source: MDPI journal article supplement (doi:10.3390/ijms160819812), 2015-08-20
Supplement: s1 [file s1]

## Supplementary Information

**Table S1.** Total number and average length of protein sequences in the analyzed algae proteomes.

| Species                   | Number of Sequences |                 | Average Protein Sequence Length after Filtering |
|---------------------------|---------------------|-----------------|-------------------------------------------------|
|                           | Before Filtering    | After Filtering |                                                 |
| <i>O. sp. RCC809</i>      | 7773                | 7670            | 378                                             |
| <i>O. tauri</i>           | 7725                | 7606            | 383                                             |
| <i>M. sp. RCC299</i>      | 10,103              | 9956            | 471                                             |
| <i>M. pusilla</i>         | 10,660              | 10,542          | 440                                             |
| <i>C. sp. C-169</i>       | 9629                | 9367            | 423                                             |
| <i>C. vulgaris</i>        | 9994                | 9760            | 401                                             |
| <i>V. carteri</i>         | 14,542              | 13,852          | 562                                             |
| <i>C. reinhardtii</i>     | 16,706              | 15,624          | 493                                             |
| <i>P. ramorum</i>         | 15,743              | 13,354          | 487                                             |
| <i>P. sojae</i>           | 19,027              | 16,643          | 496                                             |
| <i>P. infestans</i>       | 22,658              | 18,825          | 394                                             |
| <i>P. capsici</i>         | 17,414              | 16,411          | 382                                             |
| <i>P. tricornutum</i>     | 10,387              | 10,036          | 457                                             |
| <i>F. cylindrus</i>       | 27,143              | 19,908          | 403                                             |
| <i>T. pseudonana</i>      | 11,637              | 11,452          | 490                                             |
| <i>A. anophagefferens</i> | 11,501              | 10,754          | 507                                             |
| <i>E. siliculosus</i>     | 16,533              | 15,318          | 516                                             |
| <i>C. merolae</i>         | 5014                | 4855            | 503                                             |
| <i>P. yezoensis</i>       | 10,327              | 9859            | 288                                             |
| <i>P. purpureum</i>       | 8355                | 7955            | 463                                             |

Data filtering was performed as described in Experimental Section.

**Table S2.** Preferences of multiple PTMs for protein disorder in species-specific and common protein clusters of each algae proteomes.

| Species     |                      | Disorder        | S-pho | T-pho | Y-pho | O-gly | N-gly | Ubi   |
|-------------|----------------------|-----------------|-------|-------|-------|-------|-------|-------|
| Green algae | <i>O. sp. RCC809</i> | specific        | 38%   | 3.1   | 2.1   | 0.8   | 1.2   | 1.2   |
|             |                      | common          | 17%   | 0.4   | 0.3   | 0.5   | 0.6   | 0.5   |
|             |                      | <i>p</i> -value | <0.05 | <0.05 | <0.05 | <0.05 | 0.222 | <0.05 |
|             |                      | ratio of s/c    | 2.2   | 7.1   | 8.0   | 1.6   | 2.0   | 2.2   |
|             | <i>O. tauri</i>      | specific        | 36%   | 4.0   | 2.4   | 0.6   | 1.8   | 0.7   |
|             |                      | common          | 18%   | 0.5   | 0.3   | 0.5   | 0.6   | 0.5   |
|             |                      | <i>p</i> -value | <0.05 | <0.05 | <0.05 | <0.05 | 0.213 | <0.05 |
|             |                      | ratio of s/c    | 2.0   | 8.3   | 7.9   | 1.2   | 3.1   | 1.4   |
|             | <i>M. sp. RCC299</i> | specific        | 41%   | 3.4   | 1.9   | 0.8   | 1.9   | 1.2   |
|             |                      | common          | 20%   | 0.6   | 0.4   | 0.5   | 0.8   | 0.6   |
|             |                      | <i>p</i> -value | <0.05 | <0.05 | <0.05 | <0.05 | 0.095 | <0.05 |
|             |                      | ratio of s/c    | 2.0   | 5.4   | 5.0   | 1.6   | 2.5   | 2.0   |
|             | <i>M. pusilla</i>    | specific        | 45%   | 3.2   | 1.7   | 0.7   | 2.1   | 1.0   |
|             |                      | common          | 20%   | 0.5   | 0.3   | 0.5   | 0.8   | 0.6   |
|             |                      | <i>p</i> -value | <0.05 | <0.05 | <0.05 | <0.05 | 0.309 | <0.05 |
|             |                      | ratio of s/c    | 2.2   | 6.2   | 6.1   | 1.4   | 2.6   | 1.8   |
|             | <i>C. sp. C-169</i>  | specific        | 36%   | 2.0   | 0.9   | 0.6   | 1.6   | 1.1   |
|             |                      | common          | 19%   | 0.5   | 0.3   | 0.5   | 0.8   | 0.6   |
|             |                      | <i>p</i> -value | <0.05 | <0.05 | 0.143 | <0.05 | <0.05 | <0.05 |
|             |                      | ratio of s/c    | 1.9   | 4.3   | 3.1   | 1.2   | 2.1   | 2.0   |
|             | <i>C. vulgaris</i>   | specific        | 42%   | 2.3   | 1.0   | 0.6   | 1.7   | 1.1   |
|             |                      | common          | 20%   | 0.5   | 0.3   | 0.5   | 0.8   | 0.6   |
|             |                      | <i>p</i> -value | <0.05 | 0.054 | 0.111 | <0.05 | <0.05 | <0.05 |
|             |                      | ratio of s/c    | 2.2   | 4.6   | 3.2   | 1.2   | 2.1   | 2.0   |

Table S2. Cont.

| Species     |                       | Disorder        | S-pho | T-pho | Y-pho | O-gly | N-gly | Ubi   |       |
|-------------|-----------------------|-----------------|-------|-------|-------|-------|-------|-------|-------|
| Green algae | <i>V. carteri</i>     | specific        | 38%   | 2.3   | 1.1   | 0.7   | 1.9   | 2.3   | 0.7   |
|             |                       | common          | 22%   | 0.6   | 0.3   | 0.5   | 0.9   | 1.2   | 0.5   |
|             |                       | <i>p</i> -value | <0.05 | <0.05 | <0.05 | <0.05 | <0.05 | <0.05 | <0.05 |
|             |                       | ratio of s/c    | 1.7   | 4.0   | 3.3   | 1.5   | 2.0   | 1.9   | 1.3   |
|             | <i>C. reinhardtii</i> | specific        | 40%   | 2.3   | 1.1   | 0.7   | 2.1   | 1.9   | 0.6   |
|             |                       | common          | 23%   | 0.6   | 0.3   | 0.5   | 1.0   | 1.1   | 0.5   |
|             |                       | <i>p</i> -value | <0.05 | <0.05 | <0.05 | <0.05 | <0.05 | 0.053 | 0.059 |
|             |                       | ratio of s/c    | 1.7   | 4.2   | 3.4   | 1.4   | 2.1   | 1.7   | 1.1   |
| Oomycetes   | <i>P. ramorum</i>     | specific        | 31%   | 1.7   | 1.0   | 0.6   | 1.1   | 1.9   | 1.1   |
|             |                       | common          | 19%   | 0.6   | 0.3   | 0.5   | 0.7   | 1.6   | 0.7   |
|             |                       | <i>p</i> -value | <0.05 | <0.05 | <0.05 | <0.05 | <0.05 | <0.05 | <0.05 |
|             |                       | ratio of s/c    | 1.6   | 2.7   | 2.9   | 1.4   | 1.5   | 1.2   | 1.7   |
|             | <i>P. sojae</i>       | specific        | 31%   | 1.9   | 1.0   | 0.6   | 1.2   | 2.2   | 1.0   |
|             |                       | common          | 20%   | 0.7   | 0.4   | 0.5   | 0.8   | 1.2   | 0.7   |
|             |                       | <i>p</i> -value | <0.05 | <0.05 | <0.05 | <0.05 | <0.05 | 0.201 | <0.05 |
|             |                       | ratio of s/c    | 1.5   | 2.7   | 2.9   | 1.4   | 1.6   | 1.9   | 1.5   |
|             | <i>P. infestans</i>   | specific        | 23%   | 1.1   | 0.6   | 0.6   | 0.8   | 1.6   | 0.7   |
|             |                       | common          | 20%   | 0.7   | 0.4   | 0.5   | 0.7   | 2.2   | 0.7   |
|             |                       | <i>p</i> -value | <0.05 | <0.05 | <0.05 | <0.05 | <0.05 | 0.363 | 0.298 |
|             |                       | ratio of s/c    | 1.2   | 1.6   | 1.6   | 1.4   | 1.2   | 0.7   | 1.0   |
|             | <i>P. capsici</i>     | specific        | 23%   | 1.2   | 0.6   | 0.5   | 0.9   | 1.9   | 0.9   |
|             |                       | common          | 18%   | 0.5   | 0.3   | 0.4   | 0.7   | 2.1   | 0.6   |
|             |                       | <i>p</i> -value | <0.05 | <0.05 | <0.05 | <0.05 | <0.05 | 0.069 | <0.05 |
|             |                       | ratio of s/c    | 1.2   | 2.6   | 2.5   | 1.5   | 1.3   | 0.9   | 1.4   |

Table S2. Cont.

| Species      |                           | Disorder        | S-pho | T-pho | Y-pho | O-gly | N-gly | Ubi   |       |
|--------------|---------------------------|-----------------|-------|-------|-------|-------|-------|-------|-------|
| Diatoms      | <i>P. tricornutum</i>     | specific        | 30%   | 2.2   | 1.1   | 0.7   | 1.4   | 2.5   | 1.5   |
|              |                           | common          | 17%   | 0.5   | 0.2   | 0.5   | 0.6   | 1.0   | 0.6   |
|              |                           | <i>p</i> -value | <0.05 | <0.05 | <0.05 | <0.05 | <0.05 | <0.05 | <0.05 |
|              |                           | ratio of s/c    | 1.8   | 4.7   | 5.1   | 1.5   | 2.4   | 2.4   | 2.6   |
|              | <i>F. cylindrus</i>       | specific        | 34%   | 1.8   | 0.9   | 0.7   | 0.9   | 3.1   | 1.7   |
|              |                           | common          | 17%   | 0.4   | 0.2   | 0.4   | 0.5   | 1.3   | 0.8   |
|              |                           | <i>p</i> -value | <0.05 | <0.05 | <0.05 | <0.05 | <0.05 | <0.05 | <0.05 |
|              |                           | ratio of s/c    | 2.2   | 5.7   | 5.4   | 1.8   | 2.3   | 2.4   | 3.1   |
|              | <i>T. pseudonana</i>      | specific        | 37%   | 2.5   | 1.1   | 0.9   | 1.3   | 2.5   | 2.0   |
|              |                           | common          | 17%   | 0.4   | 0.2   | 0.5   | 0.5   | 1.1   | 0.6   |
|              |                           | <i>p</i> -value | <0.05 | <0.05 | <0.05 | <0.05 | <0.05 | <0.05 | <0.05 |
|              |                           | ratio of s/c    | 2.2   | 5.7   | 5.4   | 1.8   | 2.3   | 2.3   | 3.1   |
| Yellow algae | <i>A. anophagefferens</i> | specific        | 27%   | 1.6   | 0.7   | 0.7   | 1.8   | 1.5   | 0.6   |
|              |                           | common          | 16%   | 0.4   | 0.2   | 0.5   | 1.0   | 0.7   | 0.3   |
|              |                           | <i>p</i> -value | <0.05 | <0.05 | <0.05 | <0.05 | <0.05 | 0.063 | <0.05 |
|              |                           | ratio of s/c    | 1.7   | 3.8   | 3.3   | 1.4   | 1.8   | 2.2   | 1.6   |
|              | <i>E. siliculosus</i>     | specific        | 42%   | 3.1   | 1.5   | 0.6   | 1.4   | 1.2   | 1.2   |
|              |                           | common          | 25%   | 1.2   | 0.5   | 0.5   | 0.9   | 0.9   | 0.7   |
|              |                           | <i>p</i> -value | <0.05 | <0.05 | <0.05 | <0.05 | <0.05 | <0.05 | <0.05 |
|              |                           | ratio of s/c    | 1.7   | 2.7   | 2.9   | 1.3   | 1.7   | 1.3   | 2.4   |

Table S2. *Cont.*

| Species   |                     | Disorder        | S-pho | T-pho | Y-pho | O-gly | N-gly | Ubi   |       |
|-----------|---------------------|-----------------|-------|-------|-------|-------|-------|-------|-------|
| Red algae | <i>C. merolae</i>   | specific        | 29%   | 1.9   | 1.1   | 0.6   | 1.4   | 2.9   | 0.8   |
|           |                     | common          | 22%   | 0.9   | 0.5   | 0.5   | 0.9   | 2.0   | 0.5   |
|           |                     | <i>p</i> -value | <0.05 | 0.084 | <0.05 | <0.05 | <0.05 | 0.301 | <0.05 |
|           |                     | ratio of s/c    | 1.3   | 2.1   | 2.2   | 1.3   | 1.6   | 1.4   | 1.5   |
|           | <i>P. yezoensis</i> | specific        | 21%   | 1.3   | 0.8   | 0.6   | 1.6   | 1.2   | 0.4   |
|           |                     | common          | 19%   | 0.8   | 0.5   | 0.5   | 1.3   | 1.1   | 0.3   |
|           |                     | <i>p</i> -value | <0.05 | <0.05 | <0.05 | <0.05 | <0.05 | <0.05 | <0.05 |
|           |                     | ratio of s/c    | 1.1   | 1.6   | 1.5   | 1.2   | 1.2   | 1.1   | 1.6   |
|           | <i>P. purpureum</i> | specific        | 29%   | 1.9   | 0.8   | 0.6   | 1.1   | 2.0   | 1.3   |
|           |                     | common          | 22%   | 0.7   | 0.3   | 0.5   | 0.7   | 1.1   | 0.7   |
|           |                     | <i>p</i> -value | <0.05 | 0.342 | 0.053 | <0.05 | <0.05 | 0.081 | <0.05 |
|           |                     | ratio of s/c    | 1.3   | 2.6   | 2.5   | 1.1   | 1.4   | 1.8   | 1.8   |

Total values of each parameter, *p*-value from t-test and Ratio of s/c (the value of specific/the value of common) are indicated.

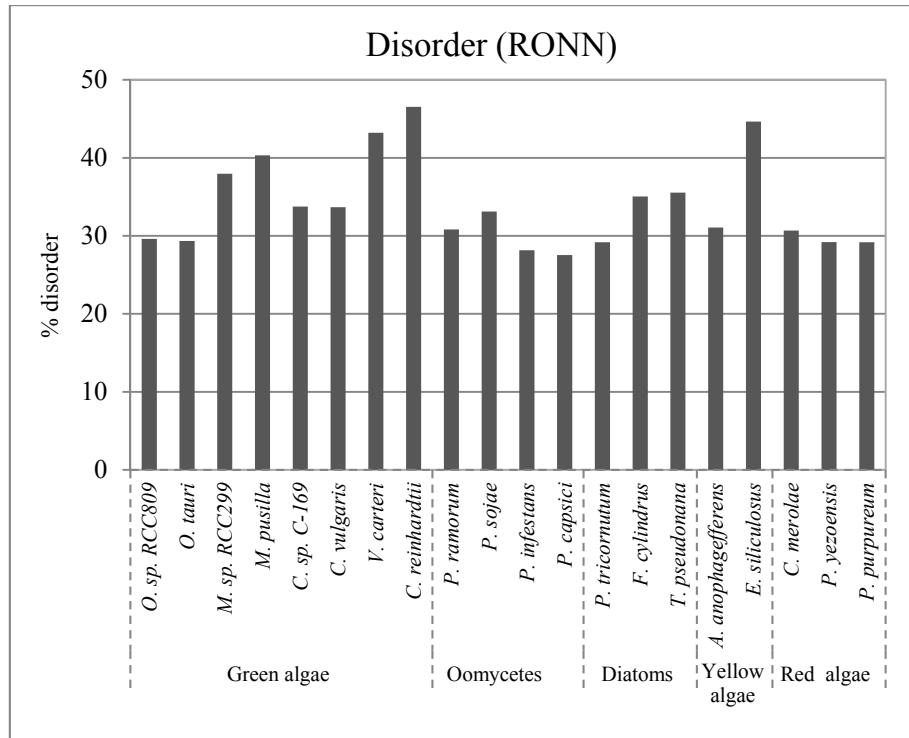

**Figure S1.** Predictive disordered protein content using the RONN tool in the studied algae proteomes.

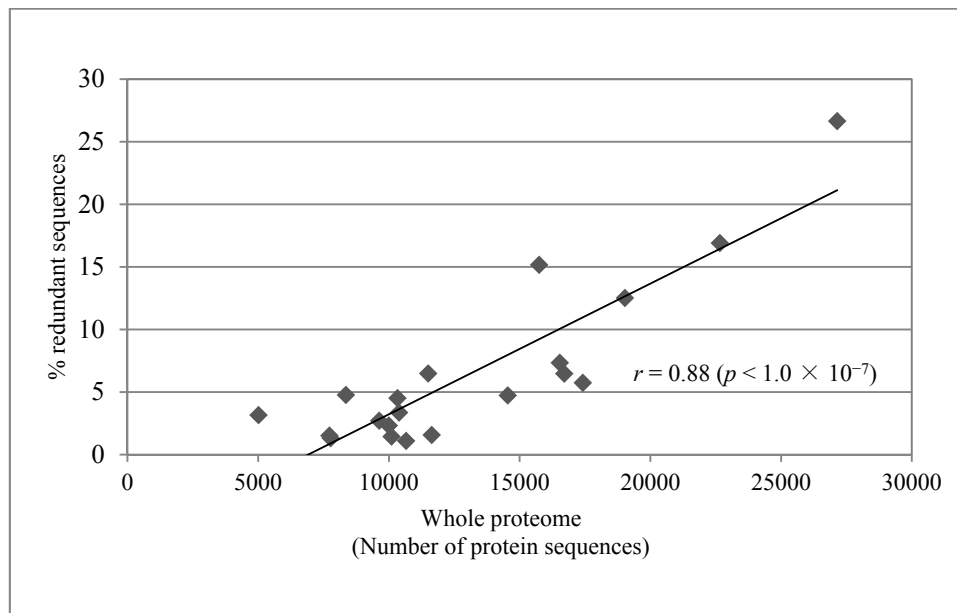

**Figure S2.** Correlation between protein redundancy and proteome size. The percentage of redundant sequences of each algal species was calculated as the number of removed sequences divided by the number of sequences before filtering sequence redundancy. The numbers of sequences before and after filtering sequence redundancy are shown in Table S1. The correlation coefficient and one-tailed probability values are indicated.

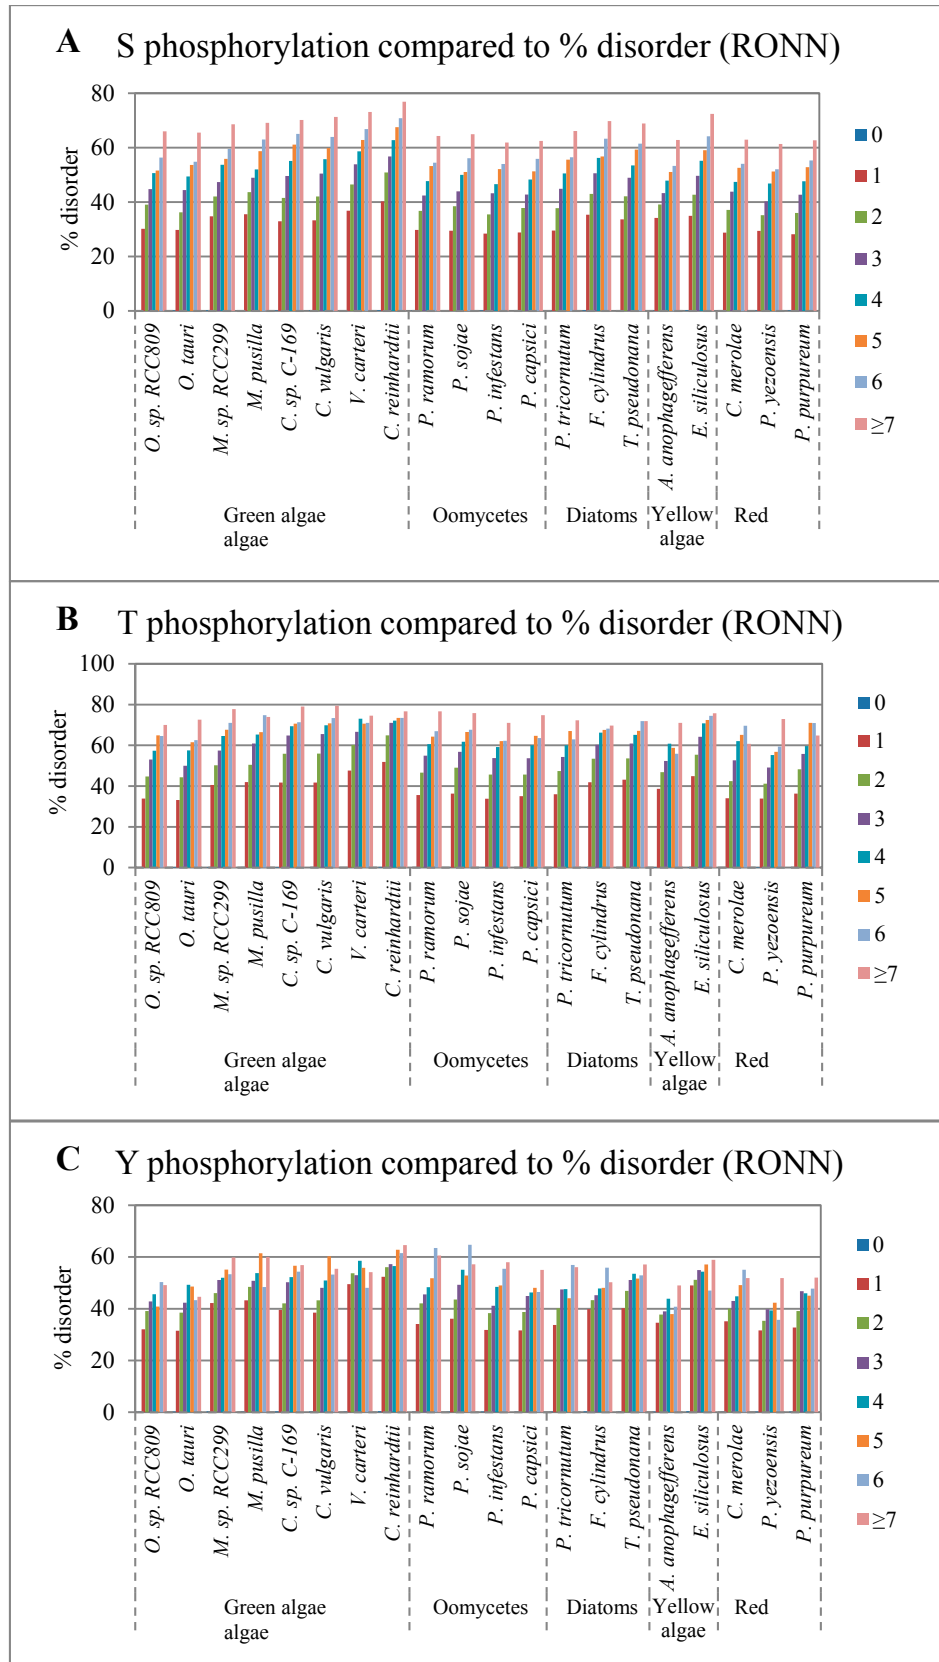

**Figure S3.** Correlation between disordered protein content and S/T/Y phosphorylation sites. Relative percentages of protein disorder calculated with the RONN tool with different numbers of predicted S, T, and Y phosphorylation sites, are presented in (A–C) respectively.

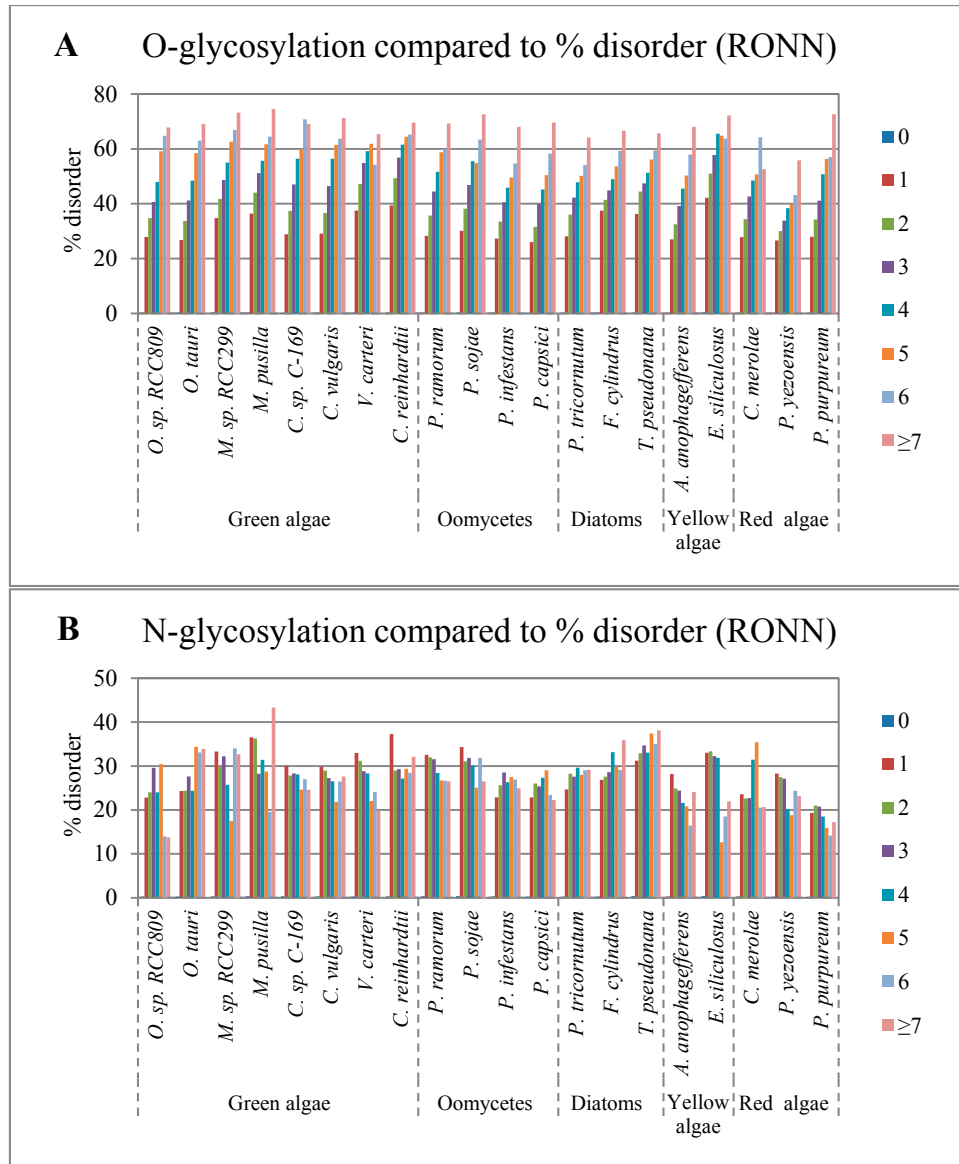

**Figure S4.** Correlation between disordered protein content and glycosylation. Relative percentages of protein disorder calculated with RONN tool with different numbers of predicted sites of O- and N-glycosylation, are presented in (A,B), respectively.



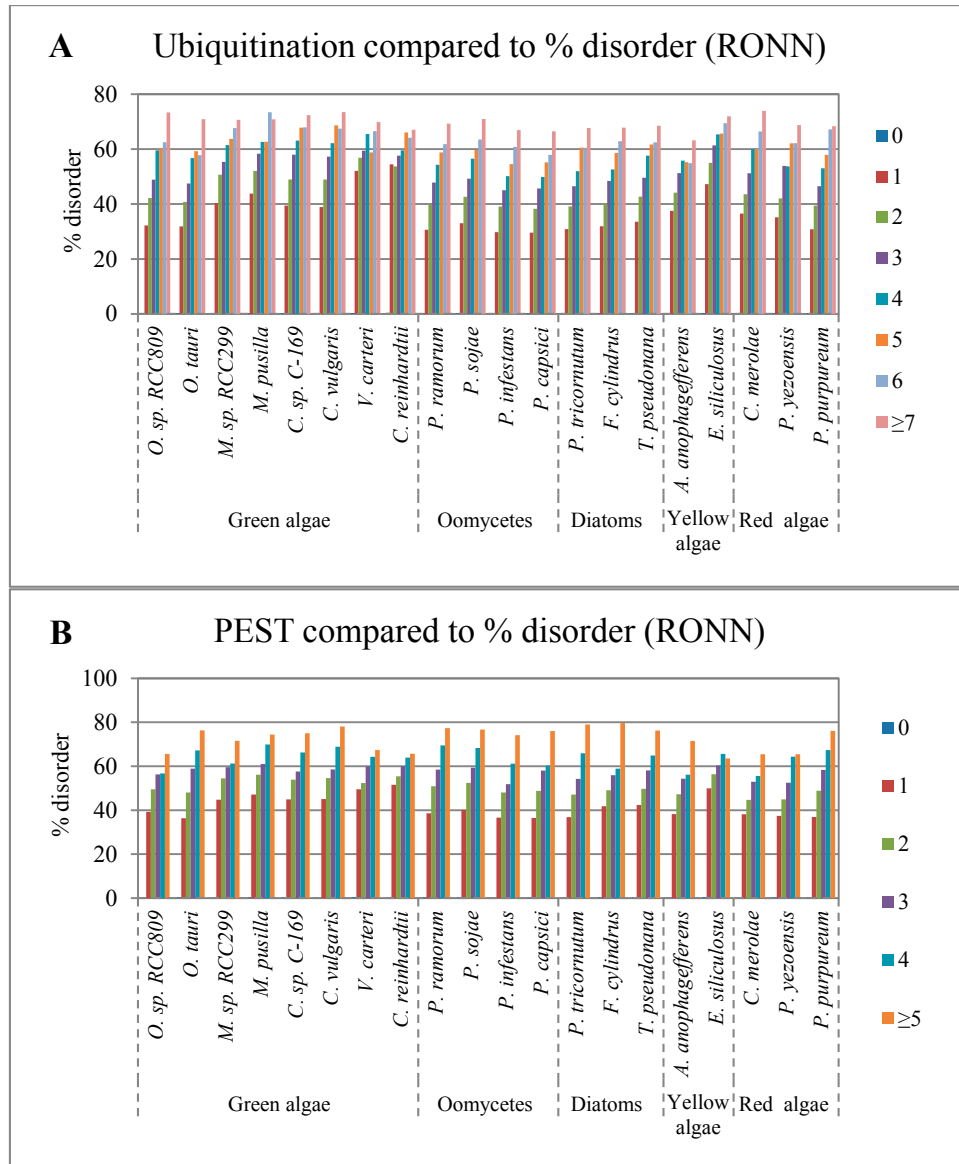

**Figure S5.** Correlations between disordered protein content and ubiquitination or PEST. Relative percentages of protein disorder calculated with RONN tool with different numbers of predicted sites of ubiquitination and predicted regions of PEST, are presented in (A,B), respectively.

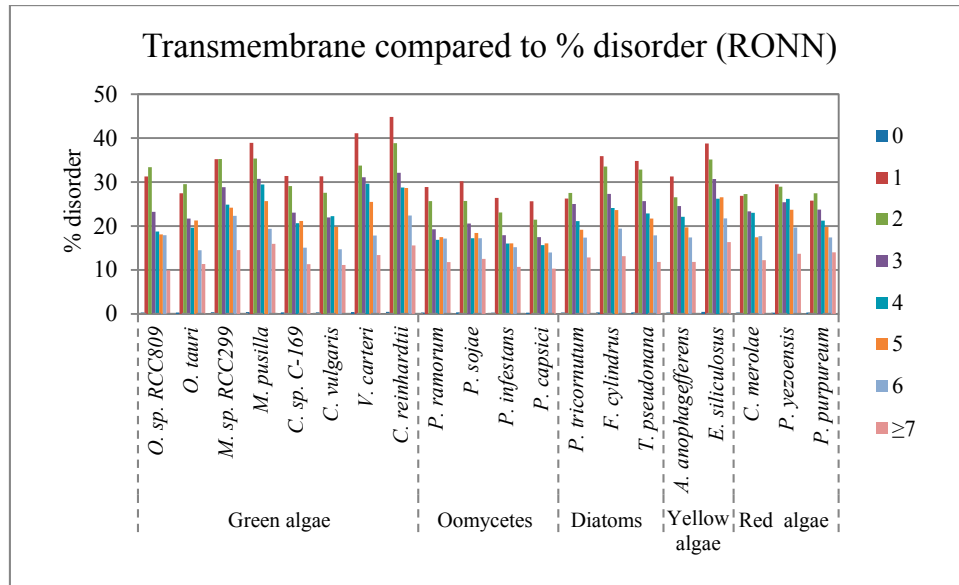

**Figure S6.** Correlations between disordered protein content and transmembrane helices. Relative percentages of protein disorder calculated with RONN tool with different numbers of predicted regions transmembrane helices, are presented.
